# Supplementary material for: Liver function test abnormalities at hospital admission are associated with severe course of SARS-CoV-2 infection: a prospective cohort study
Source: HighWire-hosted journal article supplement (doi:10.1136/gutjnl-2020-323800), 2021-01-29
Supplement: gutjnl-2020-323800supp001_data_supplement.pdf [file gutjnl-2020-323800supp001_data_supplement.pdf]

**Suppl. Table 1 Association of patient characteristics and comorbidities with with severity of the COVID-19 infection**

|                                                 | <b>OR</b> | <b>95 % CI</b> | <b>p</b>            |
|-------------------------------------------------|-----------|----------------|---------------------|
| <b>Age</b>                                      | 1.03      | 1.02-1.05      | <b>&lt; 0.001 *</b> |
| <b>Male gender</b>                              | 1.79      | 0.99-3.24      | 0.06                |
| <b>Arterial Hypertension</b>                    | 2.69      | 1.51-4.79      | <b>0.001 *</b>      |
| <b>Diabetes</b>                                 | 2.36      | 1.24-4.48      | <b>0.009 *</b>      |
| <b>Coronary artery disease</b>                  | 2.36      | 1.19-4.66      | <b>0.014 *</b>      |
| <b>Chronic kidney disease</b>                   | 1.27      | 0.63-2.56      | 0.50                |
| <b>Active solid malignancy</b>                  | 1.25      | 0.55-3.32      | 0.52                |
| <b>Former solid malignancy</b>                  | 1.49      | 0.57-3.91      | 0.42                |
| <b>Myocardial infarction in patient history</b> | 3.03      | 1.16-7.94      | <b>0.024 *</b>      |
| <b>COPD</b>                                     | 2.54      | 0.89-7.38      | 0.08                |
| <b>Active smoker</b>                            | 1.00      | 0.30-3.30      | 1.00                |
| <b>Former smoker</b>                            | 2.23      | 0.89-5.62      | 0.09                |
| <b>Smoking (actively or previously)</b>         | 2.20      | 0.88-5.52      | 0.09                |

Stated are the odds ratios (OR) for age, gender and relevant comorbidities. <sup>1</sup> Severe COVID-19 was defined by the composite endpoint comprised of ICU admission and/or COVID-19-related death. Abbreviations: CI: Confidence Interval; COPD: Chronic obstructive pulmonary disease; COVID-19: Coronavirus Disease 2019; ICU: Intensive care unit. \* shows a statistical significance (p≤0.05).
